# Supplementary material for: Intra-Hospital, Inter-Hospital and Intercontinental Spread of ST78 MRSA From Two Neonatal Intensive Care Unit Outbreaks Established Using Whole-Genome Sequencing
Source: Front Microbiol. 2018 Jul 4;9:1485. doi: 10.3389/fmicb.2018.01485 (PMC6039561; doi:10.3389/fmicb.2018.01485)
Supplement: Supplementary file 1 [file Data_Sheet_1.XLSX]

## Sheet: Sheet2
	Dataset S1 Raw read, de novo assembly and whole-genome multilocus sequence typing quality statistics
	Raw sequence reads		Sequence reads after trimming		de novo assembly				Assembly-free wgMLST allele calls		Assembly-based wgMLST allele calls		Summary allele calls	Core genome loci
Isolate	Average read quality	Expected coverage	Average read quality	Expected coverage	N50	Contigs	Sequence length	Average coverage	Average coverage	Present alleles	Average locus coverage	Present alleles	Present alleles	% present
P1	37	114	37	113	247448	37	2806348	110	84	2718	49	2732	2693	99
P2	37	102	37	102	714728	23	2798206	100	75	2716	38	2735	2690	100
P3	37	105	37	105	297764	40	2805588	102	77	2714	38	2731	2690	99
P4	37	119	37	119	351147	21	2798381	119	91	2717	48	2736	2695	100
P5	37	100	37	100	356874	21	2804547	98	74	2717	44	2734	2688	99
P6	37	117	37	117	714755	17	2796999	116	90	2718	52	2736	2696	100
P7	37	119	37	119	715215	14	2754718	120	93	2667	50	2685	2647	99
P8	37	129	37	129	286317	29	2777048	128	96	2687	58	2700	2655	99
P9	37	132	37	132	332237	17	2784154	132	102	2700	56	2726	2674	99
P10	37	92	37	92	260094	31	2800080	90	68	2716	40	2733	2690	99
P11	37	127	37	127	179760	31	2791912	126	97	2712	58	2728	2687	99
P12	37	118	37	118	178684	32	2799381	115	89	2717	53	2732	2692	99
P13	38	164	38	164	351136	19	2797734	163	129	2717	74	2735	2695	100
P14	37	119	37	119	716324	14	2797578	118	93	2717	54	2736	2693	100
P15	38	187	38	187	351136	21	2798499	186	145	2717	84	2735	2695	100
P16	37	168	37	168	351136	22	2797114	166	131	2717	71	2735	2696	100
P17	37	138	37	138	716577	14	2799278	137	110	2717	61	2736	2696	100
P18	37	158	37	158	297449	29	2797332	155	120	2716	69	2730	2689	100
W19	35	196	35	195	418766	19	2794154	190	133	2717	84	2734	2701	100
P20	38	167	38	167	511738	18	2796081	166	130	2717	75	2735	2696	100
P21	38	145	38	150	511792	17	2795317	150	117	2717	69	2735	2692	99
P22	38	161	38	161	511738	17	2796334	160	126	2717	74	2735	2696	100
P23	37	117	37	117	342874	21	2795454	116	87	2717	50	2736	2689	99
P24	38	131	38	130	511682	17	2795696	130	102	2717	60	2734	2695	100
P25	37	128	37	128	353717	22	2787127	128	100	2707	57	2730	2682	100
P26	36	222	36	222	1988157	15	2796263	219	162	2717	104	2736	2702	100
P27	36	204	36	204	1989995	12	2795238	201	149	2717	96	2736	2699	100
W28	36	179	36	179	864735	14	2794634	176	129	2717	78	2736	2700	100
A1	36	239	36	239	365295	16	2743144	241	182	2668	109	2680	2644	100
A2	37	320	37	320	417603	15	2764040	320	240	2689	137	2699	2669	100
A3	37	157	37	157	716339	15	2762948	158	117	2687	64	2697	2665	100
A4	36	238	36	238	950268	11	2731561	242	181	2667	110	2678	2643	100
E1	37	189	37	188	720885	14	2751306	190	148	2657	84	2674	2633	100
F1	36	262	36	262	353949	17	2785704	260	189	2710	115	2731	2692	100
F2	37	331	37	331	355246	31	2824667	325	255	2737	143	2759	2715	100
F3	37	178	37	178	721315	12	2794394	177	138	2715	76	2734	2693	100
G1	37	320	37	320	342390	24	2795363	318	250	2720	149	2734	2709	100
G2	36	281	36	281	720601	12	2747450	284	213	2662	123	2676	2635	100
G3	36	323	36	323	367246	13	2741500	327	238	2660	166	2673	2628	100
R1	37	141	37	141	1479547	14	2831298	138	103	2753	60	2776	2723	99
R2	36	277	36	277	719648	12	2837553	270	202	2766	133	2780	2734	100
T1	36	300	36	300	365547	14	2746440	303	229	2664	135	2677	2639	100
T2	37	337	37	337	365520	14	2791902	335	256	2713	150	2732	2691	99
Average	36.8605	182.581	36.8605	182.605	567102	19.4884	2.78838e+06	181.512	138.14	2707.63	81.3488	2724.7	2684.33	99.6977
